# Supplementary material for: Metalloligands for designing single-molecule and single-chain magnets
Source: Royal Society of Chemistry journal article supplement (doi:10.1039/b926739e), 2010-01-01
Supplement: b926739e.pdf [file b926739e.pdf]

# **Metalloligands for designing Single-Molecule and Single-Chain Magnets**

**Jean-Pierre Costes,<sup>a,b\*</sup> Laure Vendier<sup>a,b</sup>, Wolfgang Wernsdorfer<sup>c\*</sup>**

<sup>a</sup> *CNRS ; LCC (Laboratoire de Chimie de Coordination) ; 205, route de Narbonne, F-31077 Toulouse, France ([jean-pierre.costes@lcc-toulouse.fr](mailto:jean-pierre.costes@lcc-toulouse.fr))*

<sup>b</sup> *Université de Toulouse ; UPS, INPT ; LCC ; F-31077 Toulouse, France*

<sup>c</sup> *Institut Néel, CNRS, BP 166, 25 Avenue des Martyrs, 38042 Grenoble Cedex 9, France*

**Supplementary Material**

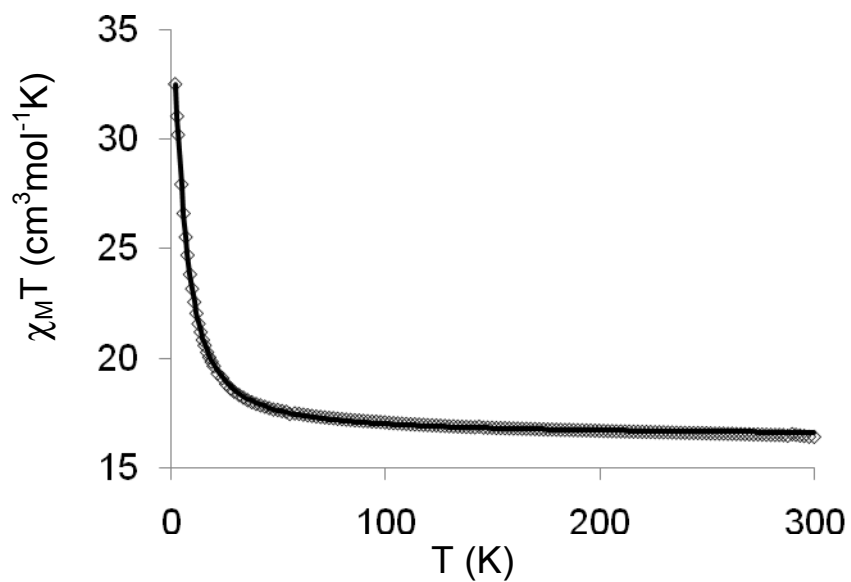

Figure S1. Experimental  $\chi_M T$  vs.  $T$  for  $[\text{L}^1\text{CuGd}(\text{thd})_2]_2$  **1**.

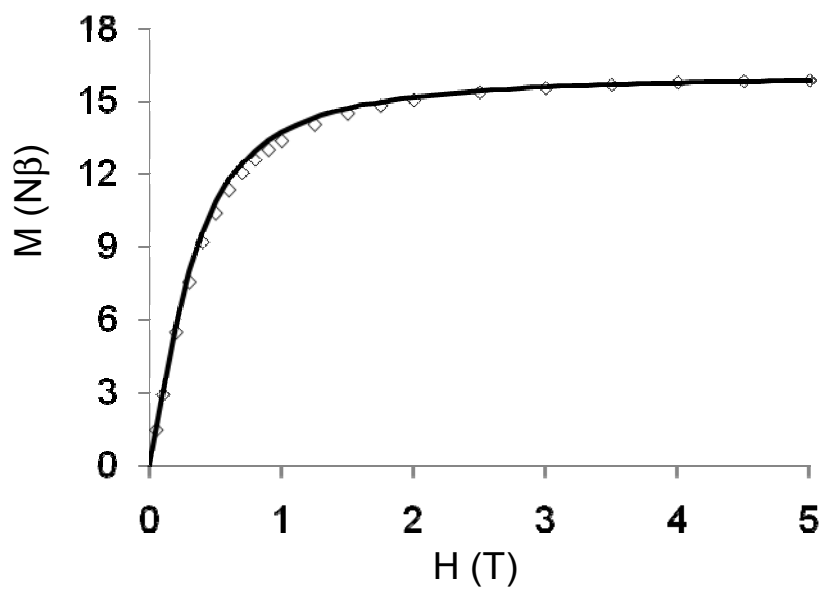

Figure S2. Field dependence of the magnetization for  $[\text{L}^2\text{CuGd}(\text{thd})_2]_2$  **1** at 2 K. The solid line corresponds to the best fit described in the text.

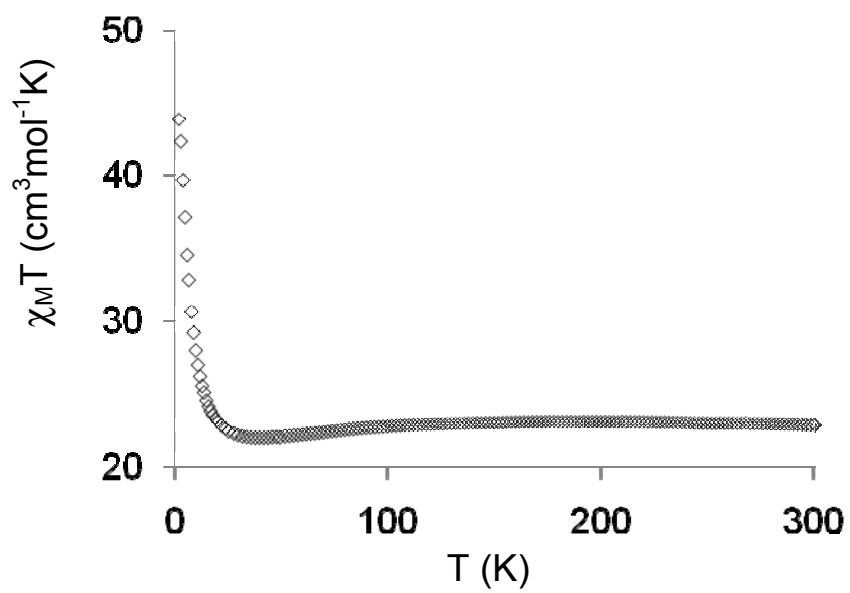

Figure S3. Experimental  $\chi_M T$  vs.  $T$  for  $[L^1CuTb(thd)_2]_2$ .

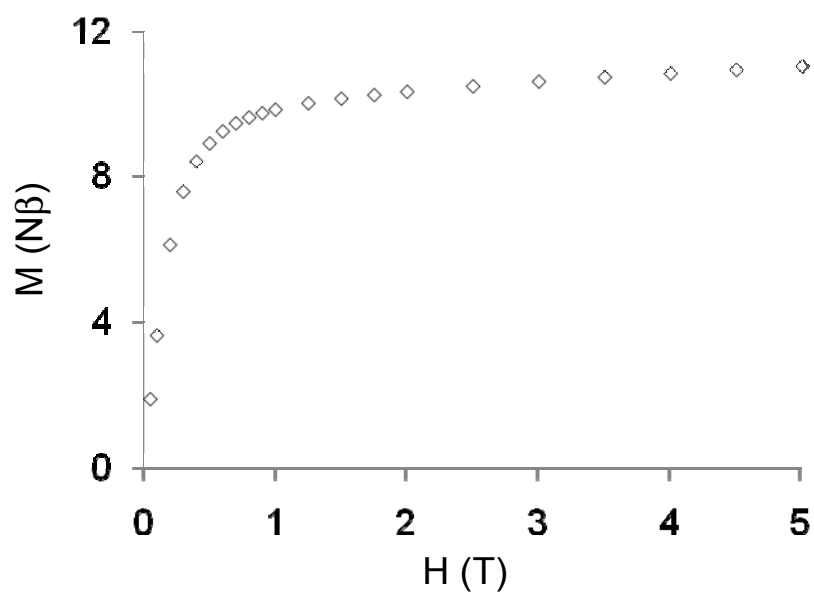

Figure S4. Field dependence of the magnetization for  $[L^2CuTb(thd)_2]_2$  **4** at 2 K.

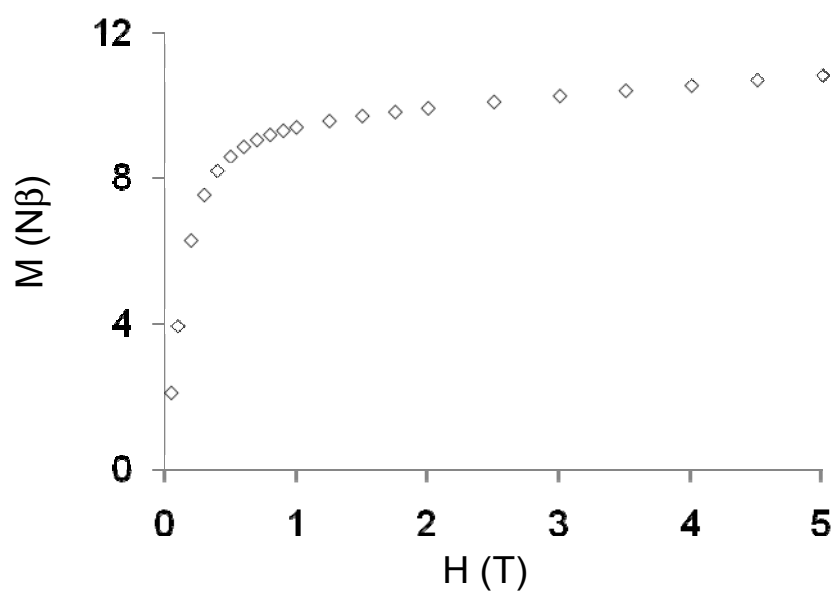

Figure S5. Field dependence of the magnetization for  $[L^1CuTb(thd)_2]_2$  **2** at 2 K.

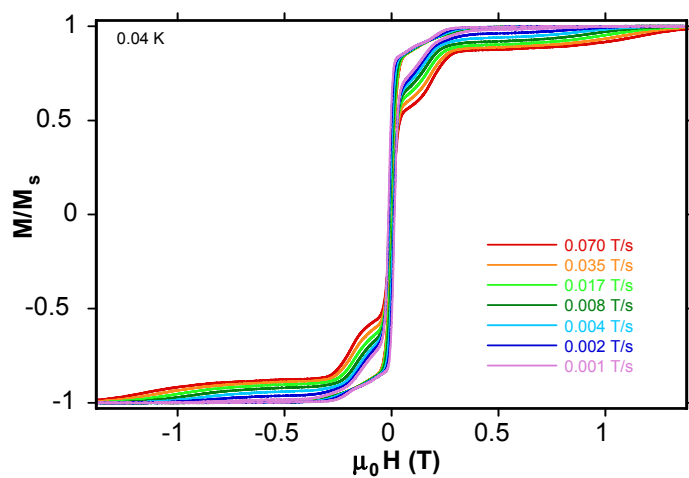

Figure S6. Magnetization (M) vs. magnetic field (H) hysteresis loops for **4** at different field sweep rates. M is normalized to its saturation value at 1.4 T.

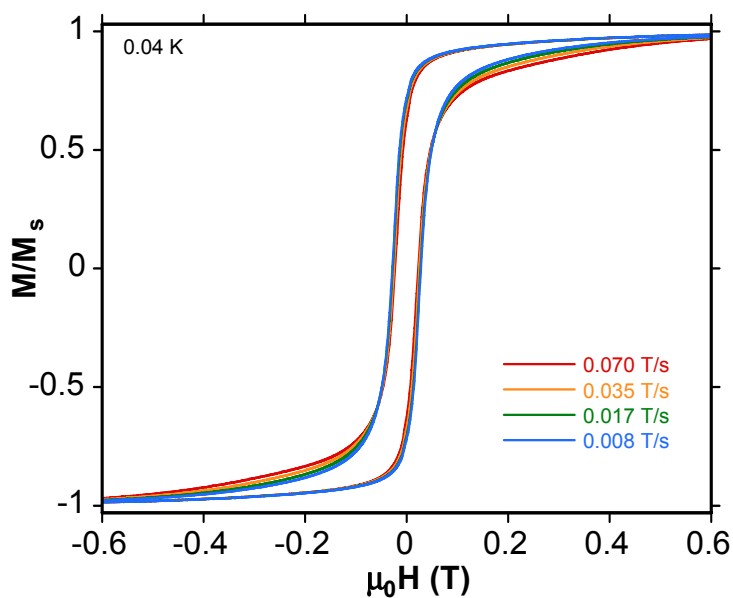

Figure S7. Magnetization (M) vs. magnetic field (H) hysteresis loops for **2** at different field sweep rates. M is normalized to its saturation value at 1.4 T.

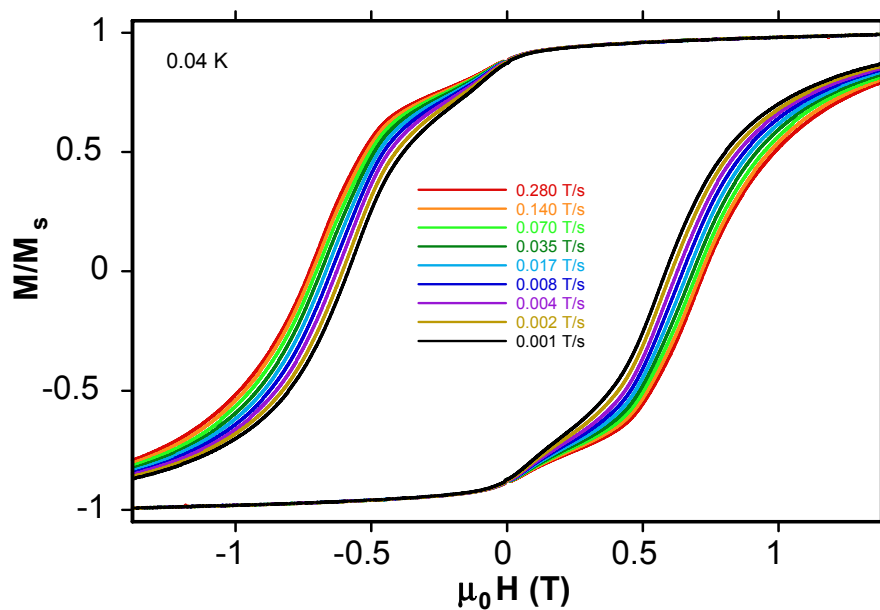

Figure S8. Magnetization (M) vs. magnetic field (H) hysteresis loops for  $[(L^1Cu)_2Tb(NO_3)(H_2O)]_n$  at different field sweep rates. M is normalized to its saturation value at 1.4 T.

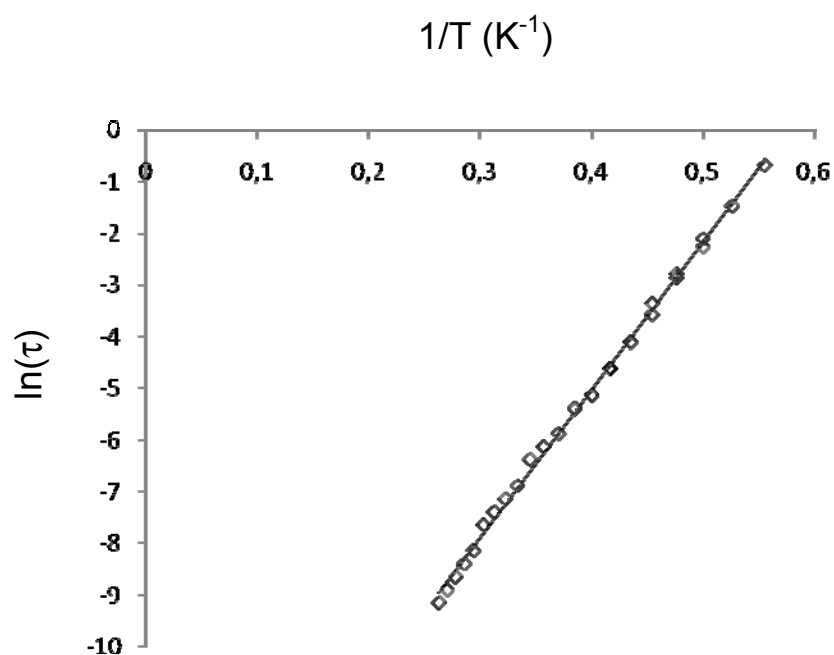

Figure S9. Arrhenius plot using ac data for  $[(L^1\text{Cu})_2\text{Tb}(\text{NO}_3)(\text{H}_2\text{O})]_n$ .

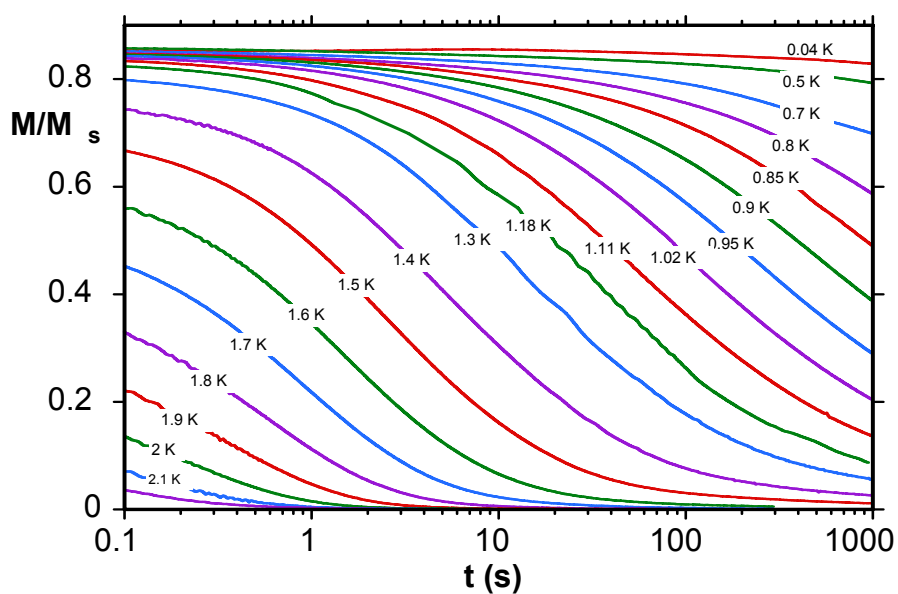

Figure S10. Dc magnetization decay data for  $[(L^1\text{Cu})_2\text{Tb}(\text{NO}_3)(\text{H}_2\text{O})]_n$ .

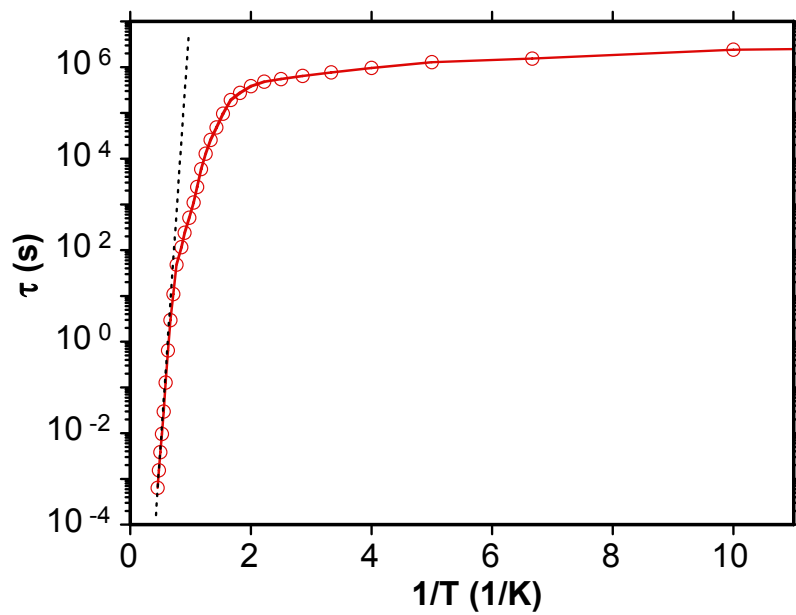

Figure S11. Arrhenius plot using dc data for  $[(L^1Cu)_2Tb(NO_3)(H_2O)]_n$ .
